# Supplementary material
Source: PubMed Central journal article supplement (PMC3046368)
Supplement: NIHMS265812-supplement-1.pdf [file NIHMS265812-supplement-1.pdf]

## Supplemental Digital Table 1

**Results From Four Independent Nominal Group Technique Sessions in Response to the Question: “What Sorts of Things Could be Included in a Curriculum That Focuses on Cultural Competency Training for Physicians?” Nominated Ideas to Include in an Online Cultural Competency Curriculum Selected by Only One Participant (n = 32).\***

| Nominated ideas                                                                                        | Rating | Nominated Ideas                                                                                                                                                          | Rating |
|--------------------------------------------------------------------------------------------------------|--------|--------------------------------------------------------------------------------------------------------------------------------------------------------------------------|--------|
| <b>Medical students, 4<sup>th</sup> Year</b>                                                           |        | <b>Practicing Physicians</b>                                                                                                                                             |        |
| Provide strategies that would be helpful overcoming language barriers.                                 | 3      | Present information on various levels of education of patients and how this influences the nature of the physician-patient relationship.                                 | 3      |
| Provide content describing how compliance with treatment can be influenced by cultural belief systems. | 3      | Address issues of proficiency of spoken English.                                                                                                                         | 3      |
| Include content reflecting how different cultures view our health system.                              | 2      | Present opportunities to learn another language for bi-lingual dialogue possibilities.                                                                                   | 2      |
| Develop a list of community resources relevant to culturally diverse patients.                         | 2      | Develop materials that reflect varying cultural viewpoints on death and dying.                                                                                           | 2      |
| Present objective data regarding risks and responses for patients from diverse populations.            | 2      | Include a review of cultural taboos, making sure to present the contradictions between Western medicine and what various cultures believe they should and should not do. | 2      |
| Provide an interface that would permit the community to interact with doctors.                         | 2      | Include information that addresses regional differences in cultures and ethnicity.                                                                                       | 1      |
| Include content on the social values and mores of various cultures.                                    | 1      | Develop methods to test the literacy of patients in order to provide meaningful written materials.                                                                       | 1      |
| Address issues fundamental to baseline professionalism.                                                | 1      | Provide information regarding variability in indigenous vernacular, colloquiums, and idioms across ethnicities.                                                          | 1      |
| Provide a review of traditional medicine used in different cultures.                                   | 1      | Include content addressing family dynamics of different cultures                                                                                                         | 1      |

|                                                                                                                                                                                                 |   |                                                                                                                                                                        |   |
|-------------------------------------------------------------------------------------------------------------------------------------------------------------------------------------------------|---|------------------------------------------------------------------------------------------------------------------------------------------------------------------------|---|
| Provide a safe on-line network/forum where it would be possible for physicians to express their views without appearing malicious.                                                              | 1 |                                                                                                                                                                        |   |
| <b>Internal medicine residents</b>                                                                                                                                                              |   | <b>Disparities researchers/<br/>educational researchers</b>                                                                                                            |   |
| Provide an overview of common religious beliefs held by different cultures.                                                                                                                     | 3 | When launching the curriculum secure “buy in” using some sort of discussion that addresses physician implied racism to help doctors understand...why this is important | 2 |
| Include content regarding values held by different cultures.                                                                                                                                    | 3 | Provide a rationale behind the use of translators along with an interactive video about how translators may be used in practice                                        | 2 |
| Include tutorials that help physicians understand how to address cultural differences.                                                                                                          | 2 | Include resources/info about where physicians can go to get information regarding broad issues of cultural competency in medicine                                      | 1 |
| Provide information regarding differences in risk behaviors related to different race/ethnic groups.                                                                                            | 2 | Incorporate a knowledge piece about EBM relationship to CV outcomes and managing pts. of diverse backgrounds                                                           | 1 |
| Provide training in prevention and information that could be used for health education for patients.                                                                                            | 1 | Provide opportunities that will encourage participants to become more comfortable with their own attitudes regarding differences                                       | 1 |
| Include information that outlines culturally inappropriate ways of interacting (e.g. certain things you should avoid in interactions with patients from various cultures (only address males)). | 1 | Include information/content regarding the social and cultural determinants of health                                                                                   | 1 |
| Provide educational material about resources available within the health system and what it is actually that doctors can provide.                                                               | 1 |                                                                                                                                                                        |   |
| Provide information regarding different cultural views regarding end of life care.                                                                                                              | 1 |                                                                                                                                                                        |   |
| Include content addressing family dynamics of different cultures                                                                                                                                | 1 |                                                                                                                                                                        |   |

\* Ratings indicate the most (3), next-to-most (2), and least (1) important, or feasible, idea. For the nominated ideas selected by at least two participants, see Table 1 in the report.
